# Supplementary material for: Heterojunction photoanodes for solar water splitting using chemical-bath-deposited In2O3 micro-cubes and electro-sprayed Bi2WO6 textured nanopillars
Source: Royal Society of Chemistry journal article supplement (doi:10.1039/c5ra16833c), 2015-01-01
Supplement: c5ra16833c1.pdf [file c5ra16833c1.pdf]

### Supporting Information

## Heterojunction photoanodes for solar water splitting using chemical-bath-deposited $\text{In}_2\text{O}_3$ micro-cubes and electro- sprayed $\text{Bi}_2\text{WO}_6$ textured nanopillars

Bhavana Joshi<sup>1, †</sup>, Hyun Yoon<sup>1, †</sup>, Hayong Kim<sup>1</sup>, Min-woo Kim<sup>1,2</sup>, Mukund G. Mali<sup>1</sup>

Salem S. Al-Deyab<sup>3</sup>, Sam S. Yoon<sup>1,\*</sup>

<sup>1</sup>School of Mechanical Engineering, Korea University, Seoul 136-713, Republic of Korea

<sup>2</sup>Green School, Korea University, Seoul, 136-713, Republic of Korea

<sup>3</sup>Petrochemicals Research Chair, Department of Chemistry, King Saud University, Riyadh 11451, Saudi Arabia

\*Corresponding author: [skyoona@korea.ac.kr](mailto:skyoona@korea.ac.kr)

†Equal contribution

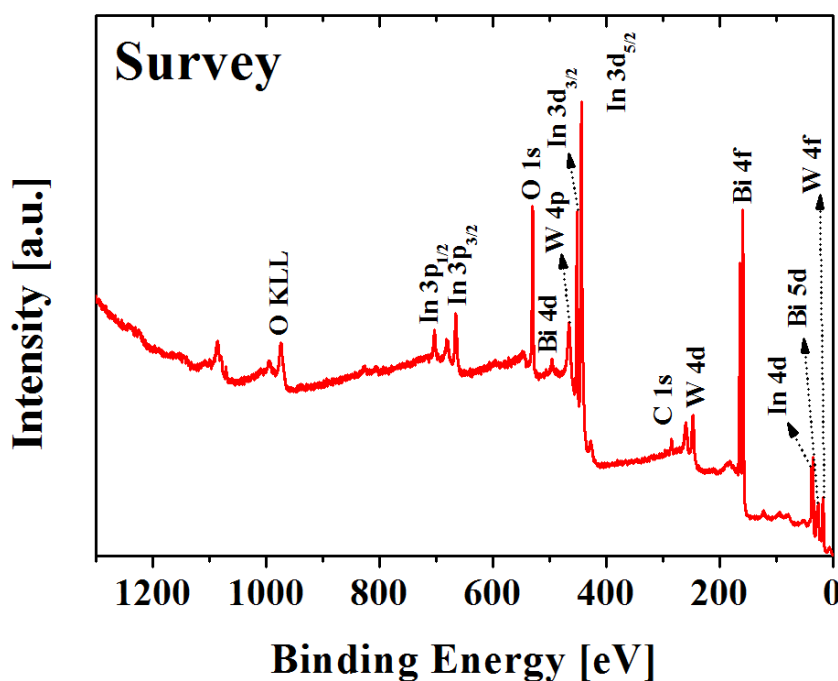

Figure S1 XPS survey spectra of Bilayer In<sub>24</sub>-Bi<sub>80</sub> film

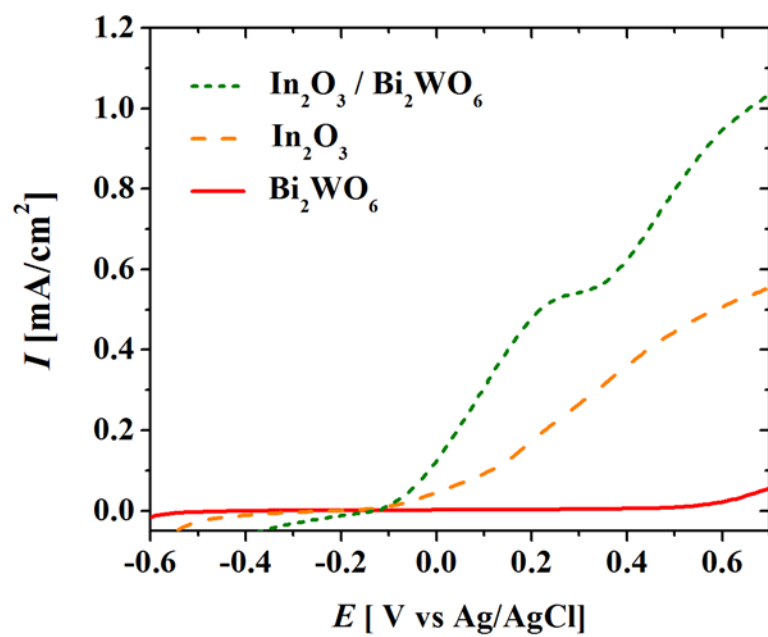

Figure S2 photocurrent of individual layers of Bi80, In24 and Bilayer In24-Bi80 film
